# Supplementary material for: The Impact of Biologics and Tofacitinib on Cardiovascular Risk Factors and Outcomes in Patients with Rheumatic Disease: A Systematic Literature Review
Source: PubMed Central journal article supplement — Drug Saf. 2018 Jan 9;41(5):473–88. doi: 10.1007/s40264-017-0628-9 (PMC5938314; doi:10.1007/s40264-017-0628-9), 2018-01-09
Supplement: 40264_2017_628_MOESM2_ESM.pdf [file 40264_2017_628_MOESM2_ESM.pdf]

## **Electronic Supplementary Material #2**

### **The impact of biologics and tofacitinib on cardiovascular risk factors and outcomes in patients with rheumatic disease: a systematic literature review**

Michael Nurmohamed, Ernest Choy, Sadiq Lula, Blerina Kola, Ryan DeMasi, Paola Accossato

Corresponding author: Michael Nurmohamed, Head Rheumatology Research Dept | Reade,  
Department of Rheumatology, VU University Medical Center, Amsterdam, The Netherlands.

E-mail: [m.nurmohamed@reade.nl](mailto:m.nurmohamed@reade.nl)



|                         |           |           |     |           |      |           |           |     |           |        |
|-------------------------|-----------|-----------|-----|-----------|------|-----------|-----------|-----|-----------|--------|
| Patients<br>enrolled, n | 32–27,082 | 32–15,554 | 982 | 32–15,554 | 1884 | 38–15,554 | 33–27,082 | 237 | 32–68,447 | 69–956 |
|-------------------------|-----------|-----------|-----|-----------|------|-----------|-----------|-----|-----------|--------|

Blank shaded cells indicate that there were no studies in this category for that drug.

*ABA* abatacept, *ADA* adalimumab, *boDMARD* biological originator disease-modifying anti-rheumatic drug, *CV* cardiovascular, *CZP* certolizumab pegol, *ETN* etanercept, *GLM* golimumab, *INF* infliximab, *PC* prospective cohort study, *RA* rheumatoid arthritis, *RC* retrospective cohort study, *RCT* randomized clinical trial, *RTX* rituximab, *SEC* secukinumab, *TCZ* tocilizumab, *TOFA* tofacitinib, *tsDMARD* targeted synthetic disease-modifying anti-rheumatic drug

**Table 2.** Baseline characteristics of patients with RA

| Baseline data     | boDMARD   |           |           |           |     |           |           |     |           | tsDMARD   |
|-------------------|-----------|-----------|-----------|-----------|-----|-----------|-----------|-----|-----------|-----------|
|                   | ABA       | ADA       | CZP       | ETN       | GLM | INF       | RTX       | SEC | TCZ       | TOFA      |
| Number of studies |           |           |           |           |     |           |           |     |           |           |
| RCT               | 1         | 5         | 1         | 3         | 1   | 2         | 0         | 1   | 10        | 9         |
| nRCT              | 7         | 10        | 0         | 10        | 0   | 18        | 10        | 0   | 13        | 0         |
| Age, yrs          |           |           |           |           |     |           |           |     |           |           |
| RCT               | NR        | 52.5–63.0 | 51.4–52.4 | 59.3–61.0 | NR  | 51.6–53.0 | NA        | NR  | 49.3–62.0 | 47.9–53.0 |
| nRCT              | 55.9–58.4 | 51.0–58.4 | NA        | 40.0–57.0 | NA  | 38.0–62.7 | 49.0–60.9 | NA  | 52.0–62.8 | NA        |
| Female, %         |           |           |           |           |     |           |           |     |           |           |
| RCT               | NR        | 79.4–85.7 | 82.4–83.9 | 72.2–85.7 | NR  | 71.0–95.0 | NA        | NR  | 73.0–86.4 | 76.7–90.0 |
| nRCT              | 75.9–100  | 72.7–88.2 | NA        | 70.0–100  | NA  | 40.8–100  | 71.0–100  | NA  | 75.9–87.0 | NA        |

|                          |          |            |             |           |    |           |           |    |           |            |  |
|--------------------------|----------|------------|-------------|-----------|----|-----------|-----------|----|-----------|------------|--|
| Disease duration,<br>yrs |          |            |             |           |    |           |           |    |           |            |  |
| RCT                      | NR       | 0.8–8.1    | 6.1–6.2     | 0.9–10.1  | NR | 0.4–1.0   | NA        | NR | 0.8–9.8   | 2.7–11.0   |  |
| nRCT                     | 6.2–14.6 | 0.3–14.6   | NA          | 1.0–15.2  | NA | 1.2–14.3  | 7.1–17.6  | NA | 6.2–14.6  | NA         |  |
| CRP, mg/dL               |          |            |             |           |    |           |           |    |           |            |  |
| RCT                      | NR       | 25.0–175.0 | 140.0–160.0 | 26.7      | NR | 13.7–23.6 | NA        | NR | 0.9–320.0 | 22.3–356.0 |  |
| nRCT                     | 112      | 12.0–19.0  | NA          | 20.1–80.0 | NA | 2.2–29.8  | 15.0–96.0 | NA | 3.1–181.0 | NA         |  |
| ESR, mm/h                |          |            |             |           |    |           |           |    |           |            |  |
| RCT                      | NR       | 37.0–48.5  | 42.5–45.0   | 39.0      | NR | 55.0–65.0 | NA        | NR | 38.0–50.5 | 50.5–56.0  |  |
| nRCT                     | 32.6     | 17.0–40.0  | NA          | 23.0      | NA | 30.7–41.0 | 23.0–47.1 | NA | 41.4–64.0 | NA         |  |
| DAS28                    |          |            |             |           |    |           |           |    |           |            |  |
| RCT                      | NR       | 5.3–6.8    | 6.9–7.0     | 5.2       | NR | 4.6–5.1   | NA        | NR | 5.2–6.8   | 5.6–6.5    |  |
| nRCT                     | 5.1–5.9  | 5.1–6.5    | NA          | 4.1–6.6   | NA | 4.6–6.6   | 3.7–6.6   | NA | 4.6–5.3   | NA         |  |

|                             |          |          |     |          |    |          |          |     |           |          |
|-----------------------------|----------|----------|-----|----------|----|----------|----------|-----|-----------|----------|
| History of CV risk/event, % |          |          |     |          |    |          |          |     |           |          |
| RCT                         | 0.0      | 0.0–77.2 | NR  | 0.0–83.5 | NR | 0.0–30.0 | NA       | NR  | 0.0–77.2  | 1.8–11.5 |
| nRCT                        | 8.0–45.0 | 0.0–45.0 | NA  | 0.0–59.0 | NA | 0.0–47.8 | 0.0–57.0 | NA  | 0.0–45.0  | NA       |
| Prior csDMARDs, %           |          |          |     |          |    |          |          |     |           |          |
| RCT                         | 100      | 0.0–55.9 | 100 | 0.0      | NR | 0.0–100  | NA       | 100 | 0.0–100   | 37.0–100 |
| nRCT                        | 100      | 38.2–100 | NA  | 0.0–100  | NA | 10.0–100 | 78.8–100 | NA  | 100       | NA       |
| Prior boDMARD, %            |          |          |     |          |    |          |          |     |           |          |
| RCT                         | 100      | 0.0–7.8  | NR  | 0.0      | NR | 0.0      | NA       | NR  | 0.0–100   | 1.0–19.7 |
| nRCT                        | 64.1–100 | 100      | NA  | 0.0–100  | NA | 100      | 64.1–100 | NA  | 51.0–72.0 | NA       |

*ABA* abatacept, *ADA* adalimumab, *boDMARD* biological originator disease-modifying anti-rheumatic drug, *CRP* C-reactive protein, *csDMARD* conventional synthetic disease-modifying anti-rheumatic drug, *CV* cardiovascular, *CZP* certolizumab pegol, *DAS28* disease activity score based on 28 joints, *ESR* erythrocyte sedimentation rate, *ETN* etanercept, *GLM* golimumab, *INF* infliximab, *NA* not applicable, *NR* not reported, *nRCT* not randomized clinical trial, *RA* rheumatoid arthritis, *RCT* randomized clinical trial, *RTX*

rituximab, *SEC* secukinumab, *TCZ* tocilizumab, *TOFA* tofacitinib, *tsDMARD* targeted synthetic disease-modifying anti-rheumatic drug

**Table 3.** Summary of study characteristics assessing CV risk in PsA

| Characteristic        | boDMARD     |         |        |              |         |
|-----------------------|-------------|---------|--------|--------------|---------|
|                       | ADA         | ETN     | INF    | SEC          | UST     |
| Study type, n         |             |         |        |              |         |
| RCT                   |             | 1 [105] |        | 1 [103, 104] | 1 [102] |
| PC                    |             | 1 [106] | 1 [62] |              |         |
| RC                    | 2 [41, 107] | 1 [107] |        |              |         |
| Treatment duration, w | 104–624     | 12–260  | 26     | 52           | 108     |
| Patients enrolled, n  | 210–16,842  | 84–210  | 60     | 606          | 615     |

Blank shaded cells indicate that there were no studies in this category for that drug.

*ADA* adalimumab, *boDMARD* biological originator disease-modifying anti-rheumatic drug, *CV* cardiovascular, *ETN* etanercept, *INF* infliximab, *PC* prospective cohort study, *PsA* psoriatic arthritis *RC* retrospective cohort study, *RCT* randomized clinical trial, *SEC* secukinumab, *UST* ustekinumab



**Table 4.** Baseline characteristics of patients with PsA

| Baseline data            | boDMARD   |           |     |      |           |     |
|--------------------------|-----------|-----------|-----|------|-----------|-----|
|                          | ADA       | ETN       | GLM | INF  | SEC       | UST |
| Number of studies        |           |           |     |      |           |     |
| RCT                      | 0         | 0         | 1   | 0    | 1         | 1   |
| nRCT                     | 2         | 3         | 0   | 1    | 0         | 0   |
| Age, yrs                 |           |           |     |      |           |     |
| RCT                      | NA        | NA        | NR  | NA   | 48.5–49.6 | NR  |
| nRCT                     | 42.6–48.4 | 42.7–47.1 | NA  | 42.5 | NA        | NA  |
| Female, %                |           |           |     |      |           |     |
| RCT                      | NA        | NA        | NR  | NA   | 52.5      | NR  |
| nRCT                     | 48.6–47.4 | 29.8–52.0 | NA  | 60.0 | NA        | NA  |
| Disease duration,<br>yrs |           |           |     |      |           |     |
| RCT                      | NA        | NA        | NR  | NA   | NR        | NR  |
| nRCT                     | 3.0–14.6  | 3.1–9.0   | NA  | 0.9  | NA        | NA  |
| CRP, mg/dL               |           |           |     |      |           |     |
| RCT                      | NA        | NA        | NR  | NA   | NR        | NR  |
| nRCT                     | NR        | 13.4      | NA  | NR   | NA        | NA  |
| ESR, mm/h                |           |           |     |      |           |     |

|                                |          |          |    |      |        |    |
|--------------------------------|----------|----------|----|------|--------|----|
| RCT                            | NA       | NA       | NR | NA   | NR     | NR |
| nRCT                           | NR       | 21.9     | NA | 41.0 | NA     | NA |
| DAS28                          |          |          |    |      |        |    |
| RCT                            | NA       | NA       | NR | NA   | NR     | NR |
| nRCT                           | NR       | 4.6      | NA | NR   | NA     | NA |
| History of CV<br>risk/event, % |          |          |    |      |        |    |
| RCT                            | NA       | NA       | NR | NA   | NR     | NR |
| nRCT                           | 0.0–62.7 | 0.0–61.9 | NA | 0.0  | NA     | NA |
| Prior csDMARDs,<br>%           |          |          |    |      |        |    |
| RCT                            | NA       | NA       | NR | NA   | NR     | NR |
| nRCT                           | NR       | 100      | NA | NR   | NA     | NA |
| Prior boDMARD, %               |          |          |    |      | 17.3–  |    |
| RCT                            | NA       | NA       | NR | NA   | 19.3NA | NR |
| nRCT                           | 0.0      | 0.0      | NA | NR   |        | NA |

*ADA* adalimumab, *boDMARD* biological originator disease-modifying anti-rheumatic drug, *CRP* C-reactive protein, *csDMARD* conventional synthetic disease-modifying anti-rheumatic drug, *CV* cardiovascular, *DAS28* disease activity score based on 28 joints, *ESR* erythrocyte sedimentation rate, *ETN* etanercept, *GLM* golimumab, *INF* infliximab, *NA*

not applicable, *NR* not reported, *nRCT* not randomized clinical trial, *PsA* psoriatic arthritis, *RCT* randomized clinical trial, *SEC* secukinumab, *UST* ustekinumab

**Table 5.** Summary of study characteristics assessing CV risk in AS

| Characteristic        | boDMARD |              |             |                            |              |
|-----------------------|---------|--------------|-------------|----------------------------|--------------|
|                       | ADA     | ETN          | GLM         | INF                        | SEC          |
| Study type, n         |         |              |             |                            |              |
| RCT                   |         |              | 2 [53, 110] |                            | 1 [108, 109] |
| PC                    |         | 2 [111, 112] |             | 6 [54, 55, 62,<br>113-115] |              |
| RC                    | 1 [41]  |              |             |                            |              |
| Treatment duration, w | 624     | 12–24        | 52–104      | 7–26                       | 104          |
| Patients enrolled, n  | 23,458  | 55–92        | 41–1884     | 30–82                      | 371          |

Blank shaded cells indicate that there were no studies in this category for that drug.

*ADA* adalimumab, *AS* ankylosing spondylitis, *boDMARD* biological originator disease-modifying anti-rheumatic drug, *CV* cardiovascular, *ETN* etanercept, *GLM* golimumab, *INF* infliximab, *PC* prospective cohort study, *RC* retrospective cohort study, *RCT* randomized clinical trial, *SEC* secukinumab

**Table 6.** Baseline characteristics of patients with AS

| Baseline data         | boDMARD |           |           |           |     |
|-----------------------|---------|-----------|-----------|-----------|-----|
|                       | ADA     | ETN       | GLM       | INF       | SEC |
| Number of studies     |         |           |           |           |     |
| RCT                   | 0       | 0         | 2         | 0         | 1   |
| nRCT                  | 1       | 2         | 0         | 6         | 0   |
| Age, yrs              |         |           |           |           |     |
| RCT                   | NA      | NA        | 34.2–35.6 | NA        | NR  |
| nRCT                  | 43.1    | 41.0–43.0 | NA        | 34.3–42.0 | NA  |
| Female, %             |         |           |           |           |     |
| RCT                   | NA      | NA        | 10.0      | NA        | NR  |
| nRCT                  | 27.5    | 10.0–35.0 | NA        | 1.5–13.0  | NA  |
| Disease duration, yrs |         |           |           |           |     |
| RCT                   | NA      | NA        | 8.0–11.0  | NA        | NR  |
| nRCT                  | 10.9    | 8.5       | NA        | 1.5–13.0  | NA  |
| CRP, mg/dL            |         |           |           |           |     |
| RCT                   | NA      | NA        | 19.9–23.9 | NA        | NR  |
| nRCT                  | NR      | 11.0–13.0 | NA        | 2.2–36.4  | NA  |
| ESR, mm/h             |         |           |           |           |     |
| RCT                   | NR      | 15.0–37.0 | NA        | 26.3–46.2 | NA  |

|                             |    |          |          |          |    |
|-----------------------------|----|----------|----------|----------|----|
| nRCT                        |    |          |          |          |    |
| BASDAI                      |    |          |          |          |    |
| RCT                         | NA | NA       | NR       | NA       | NR |
| nRCT                        | NR | 4.9–6.0  | NA       | 4.9–7.0  | NA |
| History of CV risk/event, % |    |          |          |          |    |
| RCT                         | NA | NA       | 0.0–40.0 | NA       | NR |
| nRCT                        | NR | 0.0–20.0 | NA       | 0.0–43.3 | NA |
| Prior csDMARDs, %           |    |          |          |          |    |
| RCT                         | NA | NA       | 0.0      | NA       | NR |
| nRCT                        | NR | NR       | NA       | 100      | NA |
| Prior boDMARD, %            |    |          |          |          |    |
| RCT                         | NA | NA       | NR       | NA       | NR |
| nRCT                        | NR | NR       | NA       | NR       | NA |

adalimumab, *AS* ankylosing spondylitis, *BASDAI* Bath Ankylosing Spondylitis Disease Activity Index, *boDMARD* biological originator disease-modifying anti-rheumatic drug, *CRP* C-reactive protein, *csDMARD* conventional synthetic disease-modifying anti-rheumatic drug, *CV* cardiovascular, *ESR* erythrocyte sedimentation rate, *ETN* etanercept, *GLM* golimumab, *INF* infliximab, *NA* not applicable, *NR* not reported, *nRCT* not randomized clinical trial, *RCT* randomized clinical trial, *SEC* secukinumab

**Table 7.** Summary of study characteristics assessing CV risk in JIA

| Characteristic        | boDMARD |         |             |
|-----------------------|---------|---------|-------------|
|                       | ADA     | ETN     | TCZ         |
| Study type, n         |         |         |             |
| RCT                   |         |         | 2 [116-119] |
| PC                    |         | 1 [120] |             |
| RC                    | 1 [41]  | 1 [121] |             |
| Treatment duration, w | 624     | 52–572  | 6–104       |
| Patients enrolled, n  | 23,458  | 30–278  | 92-188      |

Blank shaded cells indicate that there were no studies in this category for that drug.

*ADA* adalimumab, *boDMARD* biological originator disease-modifying anti-rheumatic drug, *CV* cardiovascular, *ETN* etanercept, *JIA* juvenile idiopathic arthritis, *PC* prospective cohort study, *RC* retrospective cohort study, *RCT* randomized clinical trial, *TCZ* tocilizumab

**Table 8.** Baseline characteristics of patients with JIA

| Baseline data         | boDMARD |      |             |
|-----------------------|---------|------|-------------|
|                       | ADA     | ETN  | TCZ         |
| Number of studies     |         |      |             |
| RCT                   | 0       | 0    | 2           |
| nRCT                  | 1       | 2    | 1           |
| Age, yrs              |         |      |             |
| RCT                   | NA      | NA   | 6.9–13.1    |
| nRCT                  | 11.2    | 12.3 | NR          |
| Female, %             |         |      |             |
| RCT                   | NA      | NA   | 71.0–86.0   |
| nRCT                  | 80.2    | 73.0 | NR          |
| Disease duration, yrs |         |      |             |
| RCT                   | NA      | NA   | 3.4–4.7     |
| nRCT                  | 3.9     | 2.5  | NR          |
| CRP, mg/dL            |         |      |             |
| RCT                   | NA      | NA   | 218.0–266.0 |
| nRCT                  | NR      | 0.9  | NR          |
| ESR, mm/h             | NA      | NA   | 34.2–36.6   |
| RCT                   | NR      | 35.0 | NR          |



|                             |    |     |           |
|-----------------------------|----|-----|-----------|
| nRCT                        |    |     |           |
| History of CV risk/event, % |    |     |           |
| RCT                         | NA | NA  | NR        |
| nRCT                        | NR | NR  | NR        |
| Prior csDMARDs, %           |    |     |           |
| RCT                         | NA | NA  | 60.0–76.0 |
| nRCT                        | NR | 100 | NR        |
| Prior boDMARD, %            |    |     |           |
| RCT                         | NA | NA  | 18.0–39.0 |
| nRCT                        | NR | NR  | NR        |

*ADA* adalimumab, *boDMARD* biological originator disease-modifying anti-rheumatic drug, *CRP* C-reactive protein, *csDMARD* conventional synthetic disease-modifying anti-rheumatic drug, *CV* cardiovascular, *ESR* erythrocyte sedimentation rate, *ETN* etanercept, *NA* not applicable, *NR* not reported, *nRCT* not randomized clinical trial, *RCT* randomized clinical trial, *TCZ* tocilizumab
